# Supplementary material
Source: bioRxiv or medRxiv preprint supplement (https://www.medrxiv.org/highwire/filestream/98528/field_highwire_adjunct_files/0/2020.09.28.20203331-1.pdf)
Supplement: Supplementary file [file 2020.09.28.20203331-1.pdf]

# Supplemental Figure 1 - Item Level Analysis of the Item Information Curves

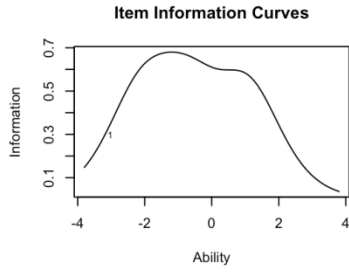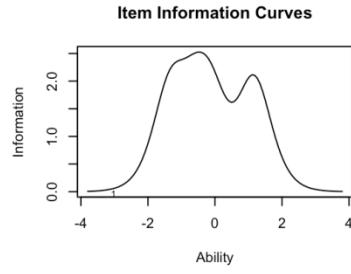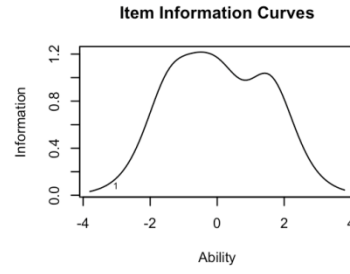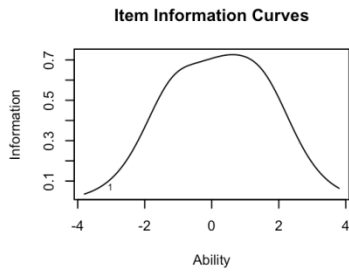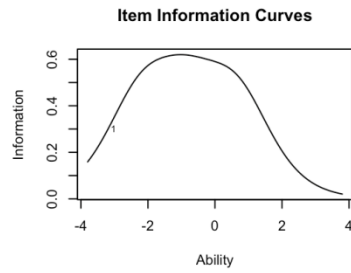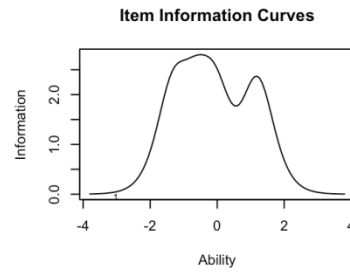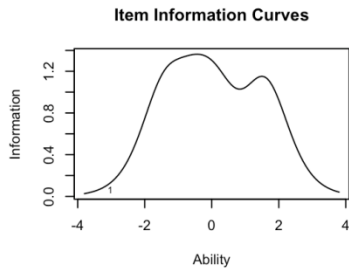

## Supplemental Figure 2 - Item Level Analysis of the Characteristic Curves

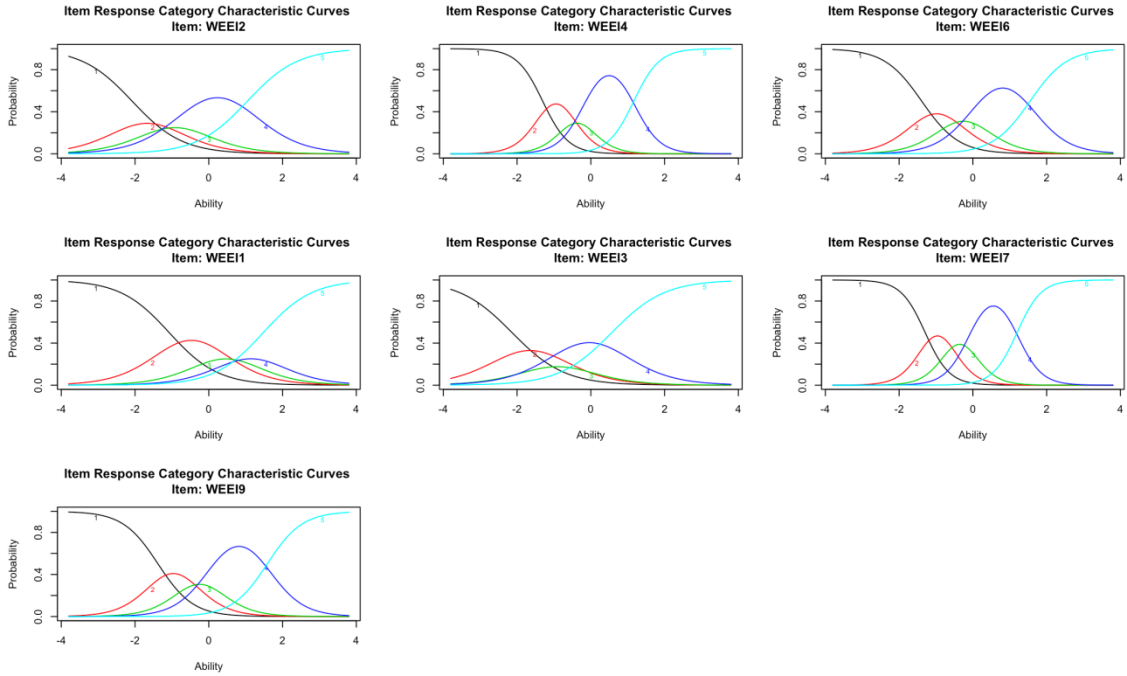

**Supplemental Table 1 - Conversion table of Summed scores into IRT-based scores based on the average across participants**

| Summed score | Mean IRT-score | SD IRT score | SE IRT score |
|--------------|----------------|--------------|--------------|
| 1            | -2,29370072    | 0            | 0            |
| 2            | -1,9823742     | 0,1137475    | 0,002258688  |
| 3            | -1,80110105    | 0,14698519   | 0,002918689  |
| 4            | -1,69188921    | 0,17468665   | 0,003468758  |
| 5            | -1,56596961    | 0,23849269   | 0,004735756  |
| 6            | -1,41679837    | 0,18414155   | 0,003656504  |
| 7            | -1,27828302    | 0,185587     | 0,003685206  |
| 8            | -1,15838956    | 0,17217852   | 0,003418954  |
| 9            | -1,01258063    | 0,18372136   | 0,00364816   |
| 10           | -0,89479916    | 0,16011227   | 0,003179354  |
| 11           | -0,7355666     | 0,15244429   | 0,003027091  |
| 12           | -0,61834542    | 0,14209309   | 0,002821547  |
| 13           | -0,49846186    | 0,14393641   | 0,002858149  |
| 14           | -0,38727117    | 0,13062085   | 0,002593742  |
| 15           | -0,28487014    | 0,12823721   | 0,00254641   |

|    |             |            |             |
|----|-------------|------------|-------------|
| 16 | -0,16242579 | 0,13008785 | 0,002583158 |
| 17 | -0,0805947  | 0,13930296 | 0,002766143 |
| 18 | 0,07421899  | 0,15634944 | 0,003104635 |
| 19 | 0,1998759   | 0,15086482 | 0,002995727 |
| 20 | 0,33619392  | 0,14525082 | 0,00288425  |
| 21 | 0,49132612  | 0,19699166 | 0,003911669 |
| 22 | 0,66017192  | 0,24800714 | 0,004924685 |
| 23 | 0,78819295  | 0,18822489 | 0,003737587 |
| 24 | 0,97916174  | 0,2209155  | 0,004386726 |
| 25 | 1,18757978  | 0,23686638 | 0,004703463 |
| 26 | 1,32750167  | 0,17320096 | 0,003439257 |
| 27 | 1,52689656  | 0,12310635 | 0,002444526 |
| 28 | 1,76048153  | 0,07338041 | 0,001457117 |
| 29 | 2,11401823  | 0          | 0           |
